# Supplementary material for: Mussel-inspired bio-compatible free-standing adhesive films assembled layer-by-layer with water-resistance
Source: Royal Society of Chemistry journal article supplement (doi:10.1039/c8ra03214a), 2018-01-01
Supplement: c8ra03214a3.pdf [file c8ra03214a3.pdf]

## Electronic Supplementary Information

### Mussel-inspired Bio-compatible Free-standing Adhesive Films Assembled Layer-by-layer with Water-resistant Capacity

Dan Wang,<sup>ab</sup> Jianfu Zhang,<sup>\*ab</sup> Yingjie Zhong,<sup>\*c</sup> Ming Chu,<sup>ab</sup> Wenyang Chang,<sup>a</sup> and

Zhanhai Yao<sup>b</sup>

<sup>a</sup>School of Chemistry and Environmental Engineering, Changchun University of Science and Technology, Changchun, 130022, P. R. China.

<sup>b</sup>State Key Laboratory of Polymer Physics and Chemistry, Changchun Institute of Applied Chemistry Chinese Academy of Sciences, Changchun, 130022, P. R. China.

<sup>c</sup>China Japan Friendship hospital, Jilin University, Changchun, 130022, P. R. China.

<sup>†</sup>Corresponding authors: zhangjianfu@cust.edu.cn; yingjiezhong76@163.com

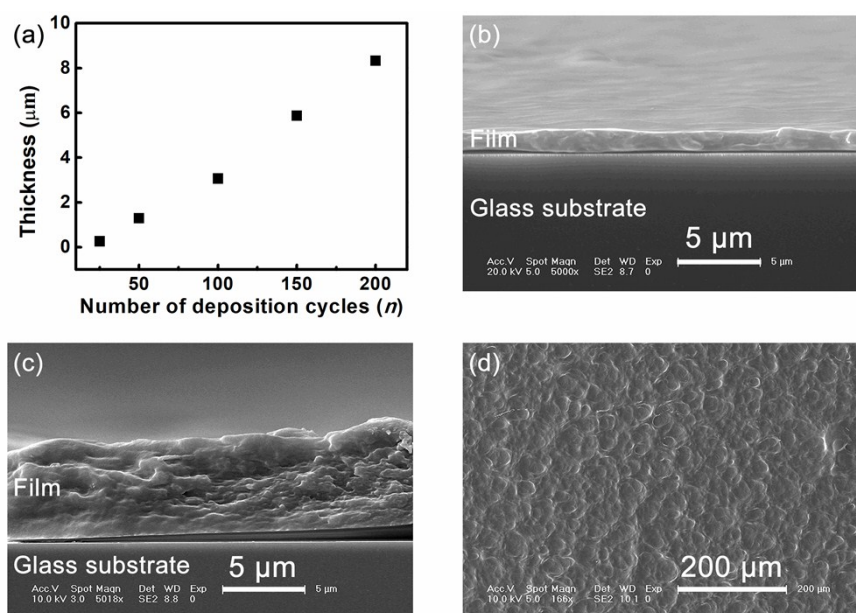

Fig. S1 (a) Thicknesses of (CHI-C/HA-D)<sup>n</sup> water-resistant adhesive films assembled by LbL as a function of deposition cycles *n*. Cross-section SEM images of (b) (CHI-C/HA-D)<sup>50</sup> and (c) (CHI-C/HA-D)<sup>150</sup> multilayer films deposited on glass substrate. (d) Surface SEM image of (c).

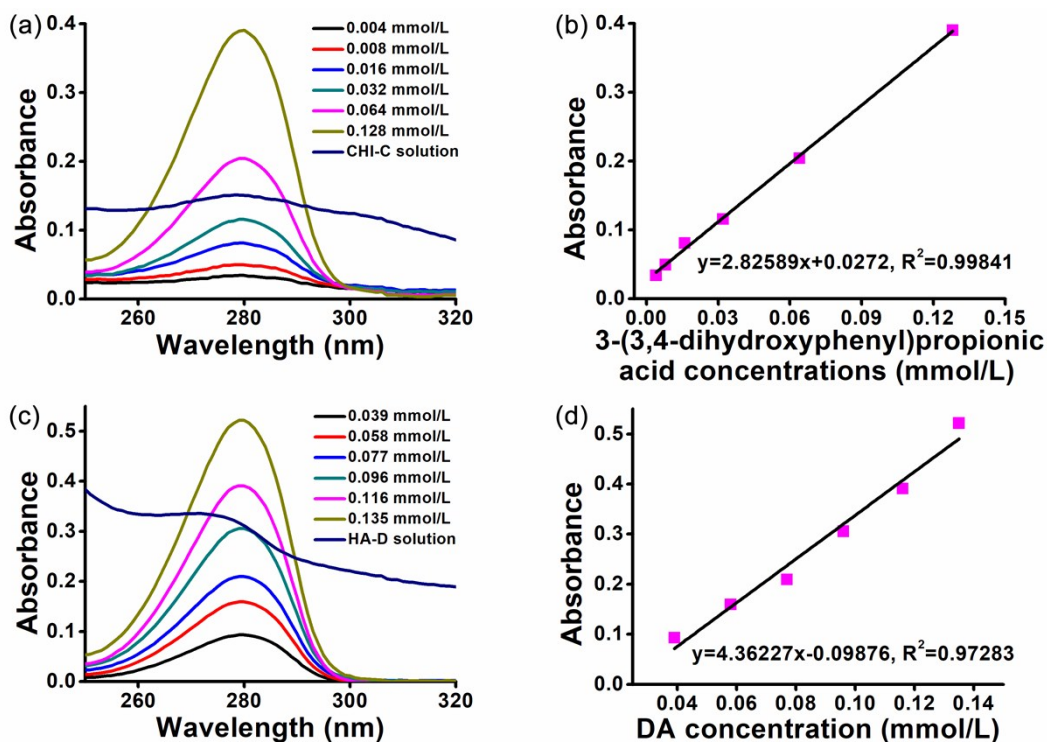

Fig. S2 UV spectra and standard curves of a series of 3-(3,4-dihydroxyphenyl)propionic acid (a,b) and DA (c,d) solutions with different concentrations at 280 nm. The blue line in a and c is the corresponding UV spectra of sample, respectively.

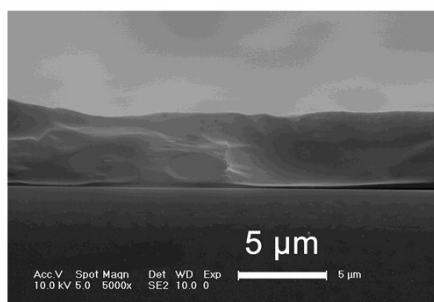

Fig. S3 Cross-section SEM image of (CHI/HA)\*50 multilayer film deposited on glass substrate.

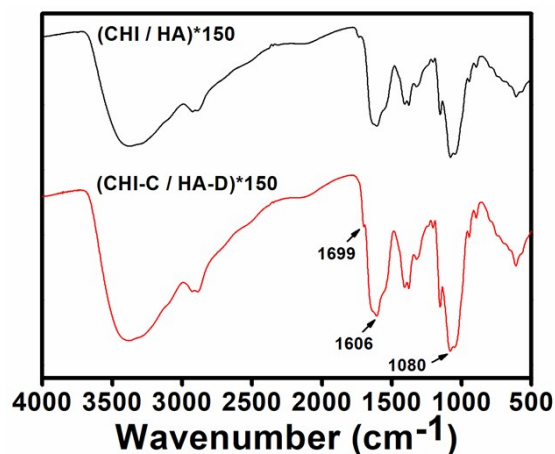

Fig. S4 FTIR spectra of (CHI-C/HA-D)\*150 and (CHI/HA)\*150 free-standing films.

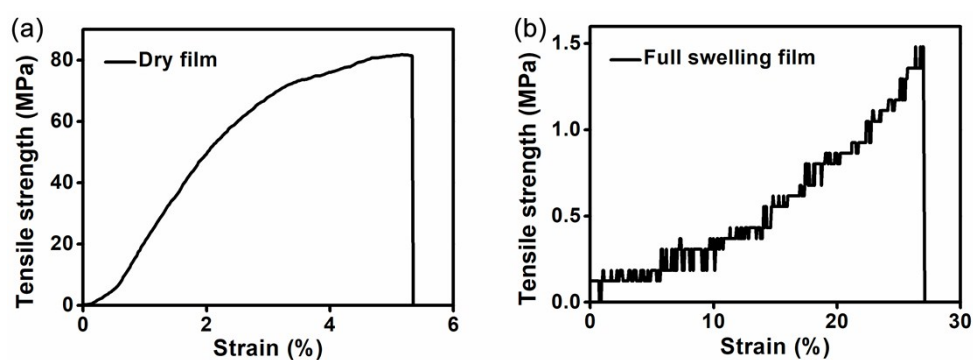

Fig. S5 Typical stress–strain curves of (a) dry and (b) full swelling (CHI-C/HA-D)\*150 free-standing adhesive film.

### Supplementary Videos

Video S1: Exfoliation process of adhesive film (3.5 cm × 2.5 cm) deposited on glass substrate.

Video S2: Porcine skin bonded with free-standing adhesive film.
